# Supplementary material for: Molecular mass growth through ring expansion in polycyclic aromatic hydrocarbons via radical–radical reactions
Source: PubMed Central journal article supplement (PMC6695427; doi:10.1038/s41467-019-11652-5), 2019-08-15
Supplement: 41467_2019_11652_MOESM1_ESM.pdf [file 41467_2019_11652_MOESM1_ESM.pdf]

## **Supplementary Information**

# **Molecular Mass Growth Processes through Ring Expansion in Polycyclic Aromatic Hydrocarbons via Radical-Radical Reactions**

Zhao et al.

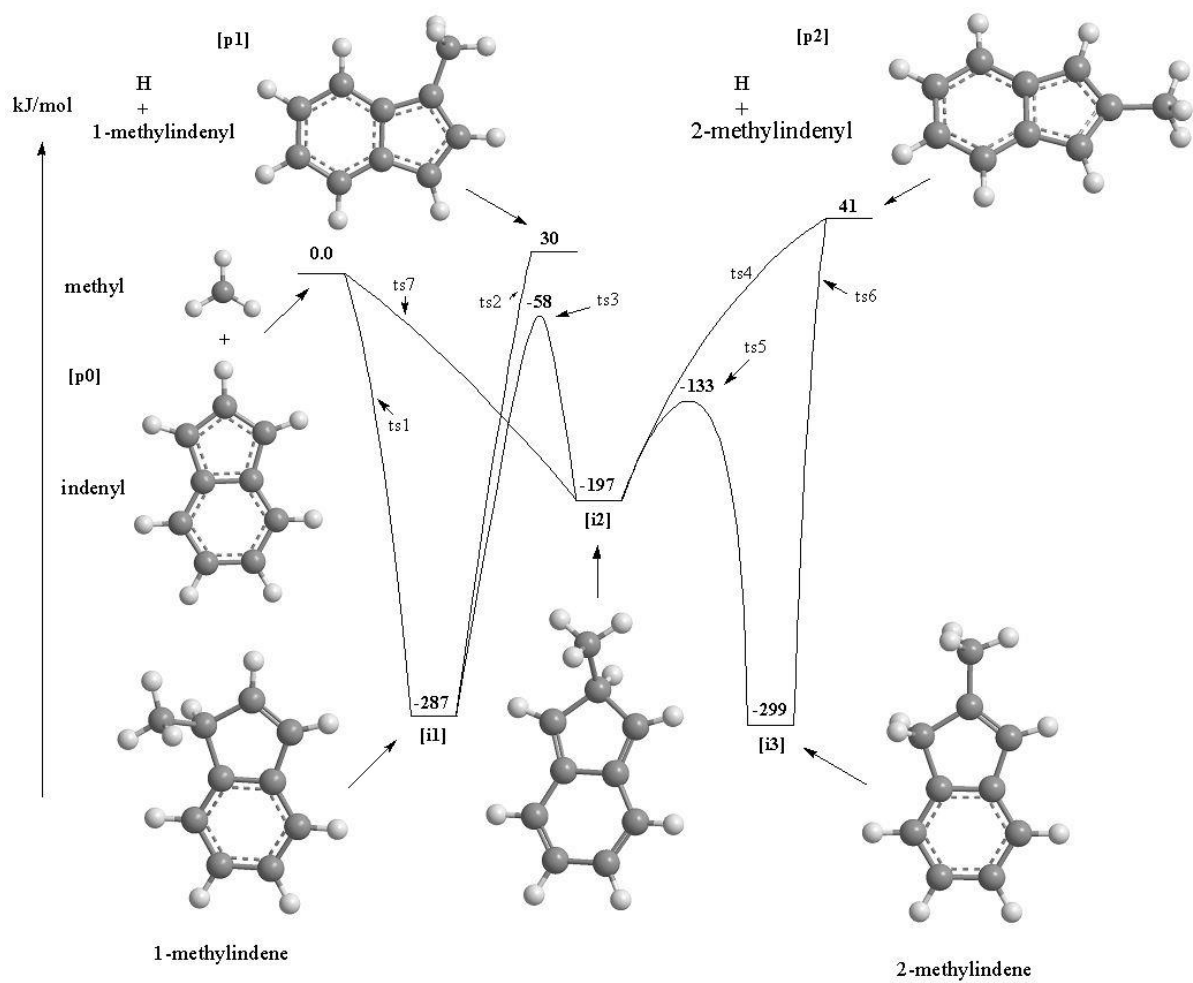

**Supplementary Figure 1.** Potential energy diagram for the indenyl + methyl reaction calculated at the CCSD(T)-F12/cc-pVTZ-f12//B3LYP/6-311G(d,p) + ZPE[B3LYP/6-311G(d,p)] level of theory. All relative energies are given in kJ/mol.

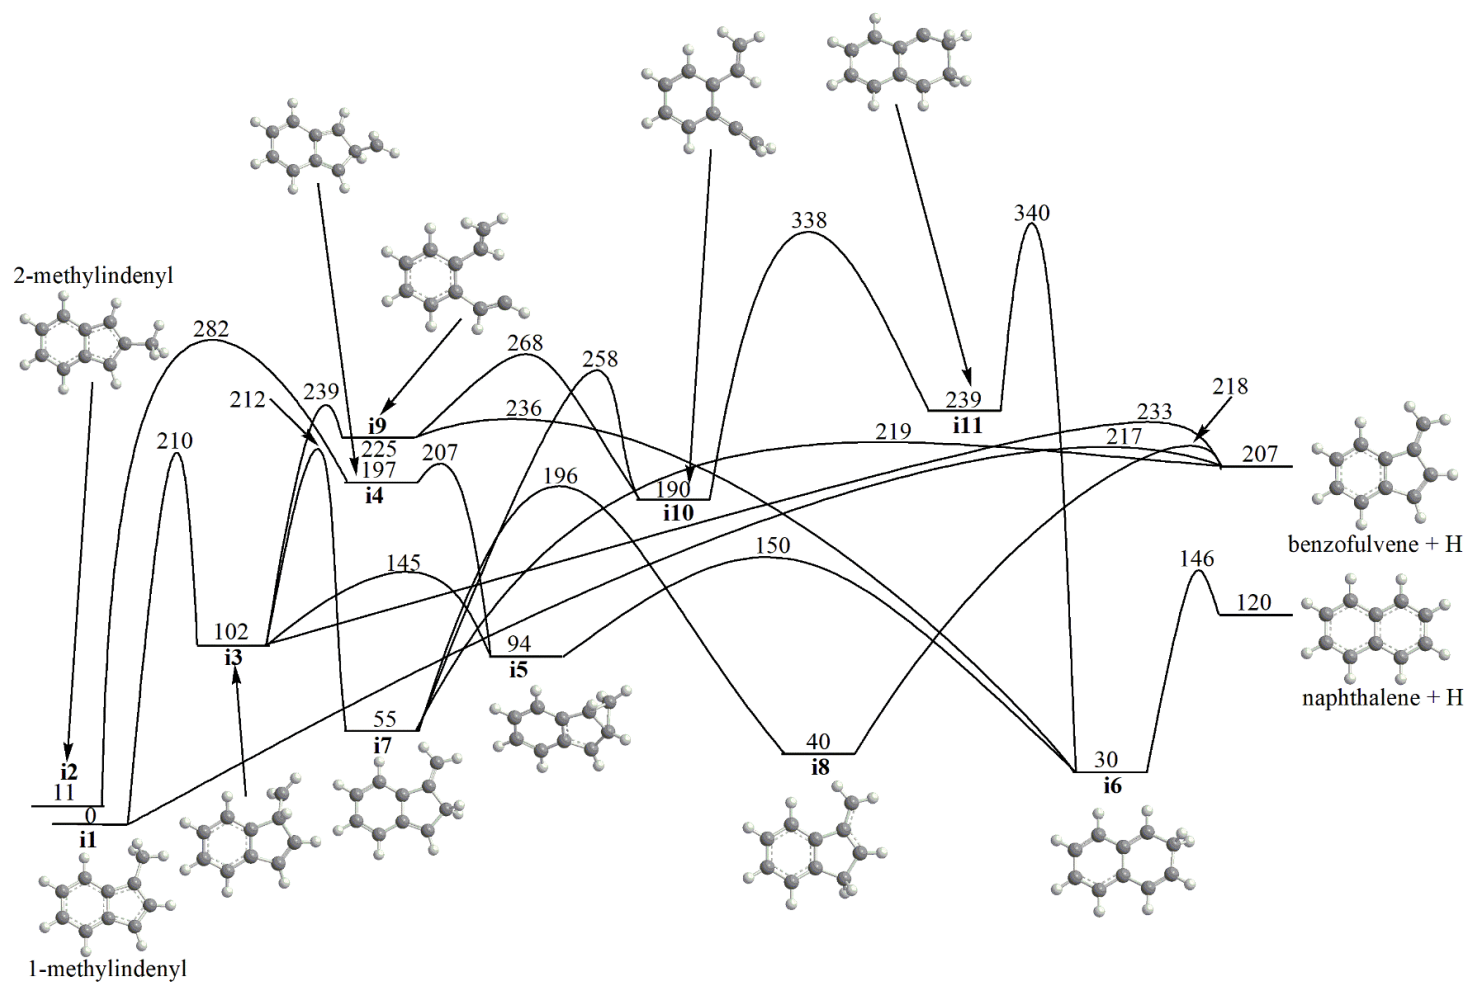

**Supplementary Figure 2.** Potential energy diagram for unimolecular decomposition of methylindenyl radicals calculated at the G3(CC,MP2)//B3LYP/6-311G(d,p) + ZPE[B3LYP/6-311G(d,p)] level of theory. All relative energies are given in kJ/mol. For more detail on this PES and temperature- and pressure-dependent rate constants see Ref. 22 in the main text.

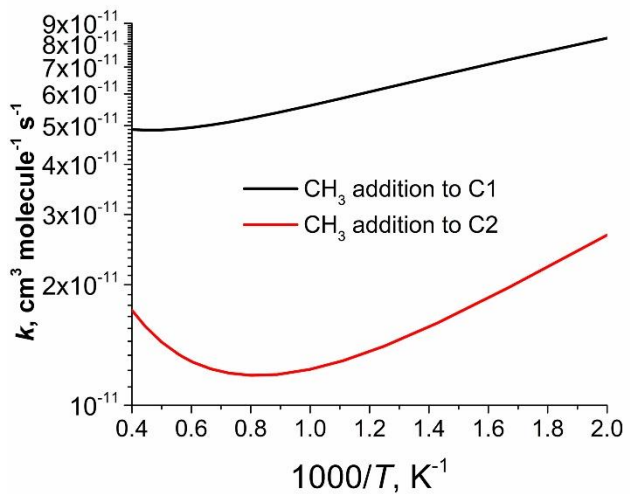

(a)

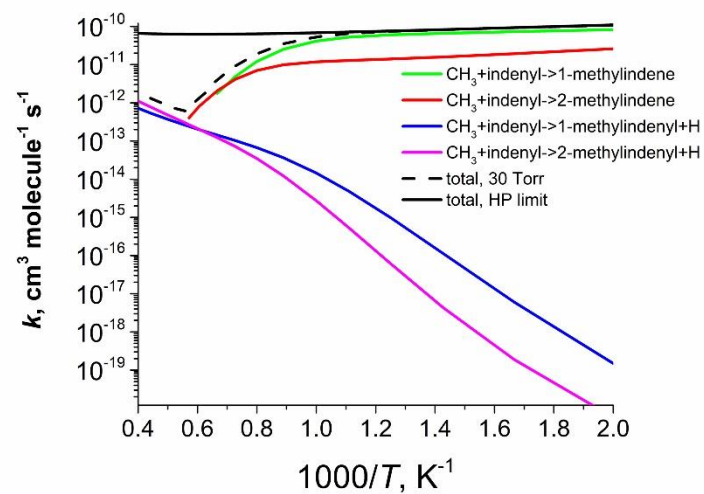

(b)

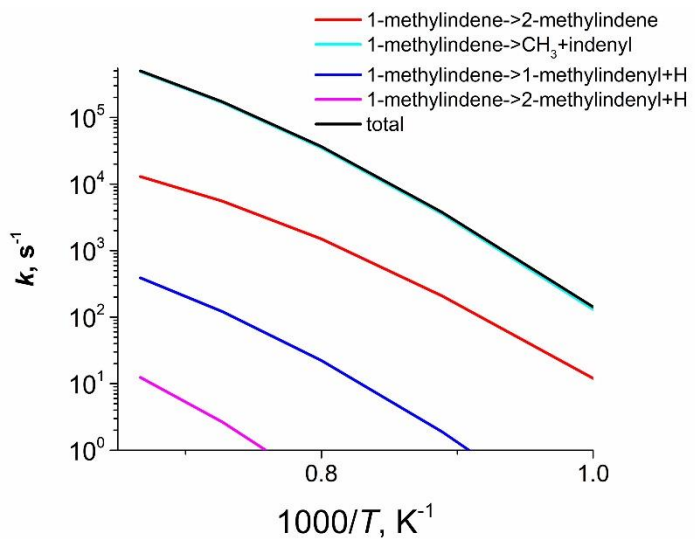

(c)

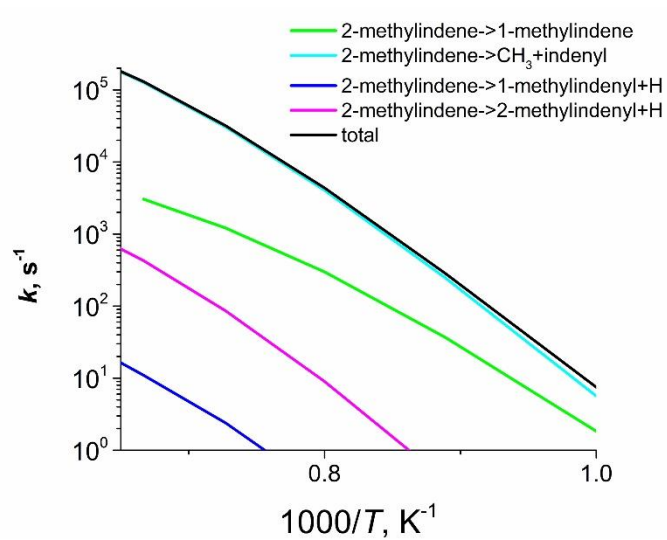

(d)

### Supplementary Figure 3.

(a) High-pressure limit rate constants for CH<sub>3</sub> addition to C1/C3 vs. C2 in indenyl. In the entrance channel, the addition to C1/C3 is favored, by a factor of ~4 at  $T$  about 1400 K, i.e., in the reactor's temperature range.

(b) Total and individual channel rate constants at 30 Torr (the typical pressure inside the reactor). Fitted modified Arrhenius expressions for all relevant reactions in the indenyl + CH<sub>3</sub> system calculated at various pressures up to 100 atm (for combustion applications) are presented in Table S1. There is a competition between collisional stabilization of 1- and 2-methylindene and the formation of bimolecular 1-/2-methylindenyl + H products. The calculated product branching ratios at 30 Torr are shown in Table S2. In the 1375-1500 K temperature range, collisionally stabilized 1- and 2-methylindene are predicted to be the predominant products with nearly equal yields, whereas the contribution of 1-/2-methylindenyl + H via well skipping pathways is only few percent.

(c) Unimolecular rate constants for isomerization/dissociation of 1-methylindene at 30 Torr.

(d) Unimolecular rate constants for isomerization/dissociation of 2-methylindene at 30 Torr.

Both methylindenes preferably decompose back to the reactants and the second most probable channel for each is isomerization to one another followed by H loss to 1- and 2-methylindenyl radicals, respectively. According to the calculated rate constants, 2-methylindene is more stable with the equilibrium constant for 1-methylindene → 2-methylindene being ~4.5 in the microreactor's temperature range. Therefore, 2-methylindene should be significantly more abundant on the exit from the reactor in agreement with the PIE fit for  $m/z = 131$ .

Source data are provided as a Source Data file.

**Supplementary Table 1.** Rate constant parameterization using modified Arrhenius expressions  $k = A_1 * T^{\alpha_1} * \exp(-E_1/T) + A_2 * T^{\alpha_2} * \exp(-E_2/T)$ .

Pre-exponential factors  $A$  are in  $\text{cm}^3 \text{ molecule}^{-1} \text{ s}^{-1}$  for bimolecular reactions and in  $\text{s}^{-1}$  for unimolecular reactions,  $T$  in K.

| <b>indenyl + methyl →</b> | <b><math>p</math></b> | <b><math>A_1</math></b> | <b><math>\alpha_1</math></b> | <b><math>E_1</math></b> | <b><math>A_2</math></b> | <b><math>\alpha_2</math></b> | <b><math>E_2</math></b> | <b><math>T</math>-range, K</b> |
|---------------------------|-----------------------|-------------------------|------------------------------|-------------------------|-------------------------|------------------------------|-------------------------|--------------------------------|
| → C1/C3                   | HP                    | 1.3276E-09              | -0.49466                     | -142.31                 | 1.2287E-12              | 0.42337                      | 1359.1                  | 500-2500                       |
| → C2                      | HP                    | 1.4856E-13              | 0.44791                      | -1200.3                 | 1.6922E-15              | 1.1692                       | 1347.9                  | 500-2500                       |
| <b>indenyl + methyl →</b> |                       |                         |                              |                         |                         |                              |                         |                                |
| <b>indenyl + methyl →</b> | <b><math>p</math></b> | <b><math>A_1</math></b> | <b><math>\alpha_1</math></b> | <b><math>E_1</math></b> | <b><math>A_2</math></b> | <b><math>\alpha_2</math></b> | <b><math>E_2</math></b> | <b><math>T</math>-range, K</b> |
| → 1-methylindene          | 30Torr                | -2.09E+76               | -26.327                      | 17489                   | 8.34E+54                | -19.763                      | 12988                   | 500-1500                       |
|                           | 1atm                  | 1.97E-12                | 0.41028                      | -588.75                 | -2.78E+25               | -9.653                       | 17680                   | 500-1750                       |
|                           | 10atm                 | 2.05E-16                | 1.6227                       | -1423.2                 | -4.48E+10               | -5.3914                      | 13296                   | 500-1800                       |
|                           | 100atm                | 2.42E+53                | -17.95                       | 23881                   | 41667                   | -4.6437                      | 2523.8                  | 500-2000                       |
| → 2-methylindene          | 30Torr                | 2.85E+89                | -29.108                      | 30323                   | 5.20E+22                | -10.609                      | 5400.4                  | 500-1750                       |
|                           | 1atm                  | 9.73E+71                | -23.607                      | 28565                   | 9.23E+11                | -7.2004                      | 3632.3                  | 500-2000                       |
|                           | 10atm                 | 8.23E+67                | -22.082                      | 30750                   | 1.91E+08                | -5.9183                      | 3613                    | 500-2250                       |
|                           | 100atm                | 5.88E+34                | -12.738                      | 18733                   | 1.56E+07                | -5.4336                      | 4716                    | 500-2500                       |
| → 1-methylindenyl + H     | 30Torr                | 1.21E+16                | -7.5678                      | 16791                   | 0.15850+104             | -29.706                      | 84154                   | 500-2500                       |
|                           | 1atm                  | 1.22E+20                | -8.4071                      | 21679                   | 0.39030+140             | -47.71                       | 35778                   | 500-2500                       |
|                           | 10atm                 | 8.30E+17                | -7.6401                      | 23488                   |                         |                              |                         | 700-2500                       |
|                           | 100atm                | 4.52E-22                | 3.0339                       | 10497                   | 7.74E+32                | -11.55                       | 33620                   | 500-2500                       |
| → 2-methylindenyl + H     | 30Torr                | 4.24E+11                | -5.9831                      | 19105                   |                         |                              |                         | 600-2500                       |
|                           | 1atm                  | 1.22E-28                | 4.9539                       | 6759.3                  | 4.02E+36                | -12.735                      | 32143                   | 500-2500                       |
|                           | 10atm                 | 1.15E+39                | -13.192                      | 36951                   | 2.49E-26                | 4.3031                       | 7586.7                  | 500-2500                       |
|                           | 100atm                | 2.21E+15                | -6.6829                      | 28484                   | 1.61E-23                | 3.5775                       | 9232.5                  | 500-2500                       |
| <b>1-methylindene →</b>   |                       |                         |                              |                         |                         |                              |                         |                                |
| → 2-methylindene          | 30Torr                | 0.13617+120             | -30.879                      | 58529                   |                         |                              |                         | 1000-1500                      |

|                        |                 |                             |                             |                             |                             |                             |                             |                          |
|------------------------|-----------------|-----------------------------|-----------------------------|-----------------------------|-----------------------------|-----------------------------|-----------------------------|--------------------------|
|                        | 1atm            | 0.81637+116                 | -29.309                     | 62662                       | 2.66E+74                    | -18.404                     | 42241                       | 800-1750                 |
|                        | 10atm           | -3.11E+56                   | -12.839                     | 36689                       | 1.11E+46                    | -9.7049                     | 34166                       | 800-1800                 |
|                        | 100atm          | 2.98E+75                    | -17.472                     | 51788                       | 4.46E+36                    | -6.9006                     | 35180                       | 500-2000                 |
| →indenyl + methyl      | 30Torr          | 0.45451+109                 | -27.153                     | 57707                       |                             |                             |                             | 800-1500                 |
|                        | 1atm            | 6.79E+22                    | -1.6881                     | 35695                       | -1.29E+64                   | -12.877                     | 55919                       | 500-1750                 |
|                        | 10atm           | 8.26E+20                    | -1.1193                     | 35240                       | -1.57E+75                   | -15.699                     | 63794                       | 500-1800                 |
|                        | 100atm          | 2.61E+80                    | -17.954                     | 57048                       | 1.75E+38                    | -6.4844                     | 38540                       | 500-2000                 |
| → 1-methylindenyl + H  | 30Torr          | 0.14432+129                 | -33.403                     | 67269                       |                             |                             |                             | 900-1500                 |
|                        | 1atm            | 0.42379+107                 | -26.563                     | 64346                       |                             |                             |                             | 900-1750                 |
|                        | 10atm           | 1.24E+12                    | 1.0987                      | 37683                       | -2.83E+52                   | -9.7794                     | 58301                       | 500-1800                 |
|                        | 100atm          | 6.05E+09                    | 1.8024                      | 37196                       | -8.12E+33                   | -4.5608                     | 51746                       | 500-2000                 |
| → 2-methylindenyl + H  | 30Torr          | 0.30003+145                 | -37.841                     | 80110                       |                             |                             |                             | 1000-1500                |
|                        | 1atm            | 0.37180+119                 | -29.783                     | 77225                       |                             |                             |                             | 1000-1750                |
|                        | 10atm           | 5.65E-04                    | 5.3376                      | 39628                       | -6.89E+13                   | 0.86649                     | 50239                       | 500-1800                 |
|                        | 100atm          | 3.75E+65                    | -14.42                      | 62486                       | 1.28E+28                    | -4.3178                     | 46389                       | 500-2000                 |
|                        |                 |                             |                             |                             |                             |                             |                             |                          |
| <b>2-methyindene →</b> | <b><i>p</i></b> | <b><i>A</i><sub>1</sub></b> | <b><i>α</i><sub>1</sub></b> | <b><i>E</i><sub>1</sub></b> | <b><i>A</i><sub>2</sub></b> | <b><i>α</i><sub>2</sub></b> | <b><i>E</i><sub>2</sub></b> | <b><i>T</i>-range, K</b> |
| → 1-methylindene       | 30Torr          | 0.31098+121                 | -31.333                     | 60399                       |                             |                             |                             | 1000-1500                |
|                        | 1atm            | 0.58750+124                 | -31.56                      | 67276                       | 5.20E+77                    | -19.374                     | 44883                       | 800-1750                 |
|                        | 10atm           | 0.21644+101                 | -24.772                     | 60424                       | 6.41E+39                    | -8.0221                     | 35916                       | 500-1800                 |
|                        | 100atm          | 1.91E+08                    | 1.8675                      | 31362                       | -4.33E+20                   | -1.4118                     | 38480                       | 500-2000                 |
| →indenyl + methyl      | 30Torr          | 0.97281+113                 | -28.108                     | 64286                       |                             |                             |                             | 1000-1750                |
|                        | 1atm            | 2.36E+98                    | -23.473                     | 63235                       | 3.93E+43                    | -8.4978                     | 40662                       | 500-2000                 |
|                        | 10atm           | 7.49E+91                    | -21.318                     | 63973                       | 5.45E+40                    | -7.4667                     | 40817                       | 500-2250                 |
|                        | 100atm          | 3.90E+63                    | -13.328                     | 53762                       | 5.00E+40                    | -7.325                      | 42062                       | 500-2500                 |
| → 1-methylindenyl + H  | 30Torr          | 0.39384+133                 | -34.474                     | 76064                       |                             |                             |                             | 1000-1750                |
|                        | 1atm            | 0.15172+127                 | -31.885                     | 80915                       |                             |                             |                             | 1000-2000                |
|                        | 10atm           | 0.44243+112                 | -27.324                     | 80934                       |                             |                             |                             | 1000-2250                |

|                       |        |             |         |       |          |         |       |           |
|-----------------------|--------|-------------|---------|-------|----------|---------|-------|-----------|
|                       | 100atm | 1.18E+90    | -20.965 | 77544 |          |         |       | 1000-2500 |
| → 2-methylindenyl + H | 30Torr | 0.33759+126 | -32.046 | 72923 |          |         |       | 1000-1750 |
|                       | 1atm   | 0.88645+106 | -25.819 | 71035 | 1.28E+47 | -9.718  | 47404 | 500-2000  |
|                       | 10atm  | 9.64E+90    | -21.191 | 69088 | 7.79E+38 | -7.103  | 46109 | 500-2250  |
|                       | 100atm | 1.95E+67    | -14.316 | 62473 | 9.91E+31 | -4.9091 | 45212 | 500-2500  |



**Supplementary Table 2.** The calculated branching ratios (%) for the main channels of indenyl + methyl reaction.

| <i>p</i> = 30 Torr |                       |                       |                           |                           |
|--------------------|-----------------------|-----------------------|---------------------------|---------------------------|
|                    | <b>1-methylindene</b> | <b>2-methylindene</b> | <b>1-methylindenyl +H</b> | <b>2-methylindenyl +H</b> |
| 500 K              | 76.1                  | 23.9                  | 0.0                       | 0.0                       |
| 600 K              | 79.0                  | 21.0                  | 0.0                       | 0.0                       |
| 700 K              | 80.6                  | 19.4                  | 0.0                       | 0.0                       |
| 800 K              | 81.2                  | 18.8                  | 0.0                       | 0.0                       |
| 900 K              | 80.4                  | 19.6                  | 0.0                       | 0.0                       |
| 1000 K             | 77.8                  | 22.2                  | 0.0                       | 0.0                       |
| 1125 K             | 71.7                  | 28.2                  | 0.1                       | 0.0                       |
| 1250 K             | 62.9                  | 36.5                  | 0.3                       | 0.2                       |
| 1375 K             | 53.1                  | 45.0                  | 1.1                       | 0.8                       |
| 1500 K             | 43.1                  | 50.5                  | 3.5                       | 3.0                       |
| 1750 K             |                       | 44.1                  | 26.4                      | 29.2                      |
| 2000 K             |                       |                       | 43.5                      | 56.5                      |
| 2250 K             |                       |                       | 41.0                      | 59.0                      |
| 2500 K             |                       |                       | 39.4                      | 60.6                      |

**Supplementary Note 1. Synthetic Procedure:**

1-Bromoindene was synthesized using the procedure described in detail in our previous publication.<sup>1</sup>

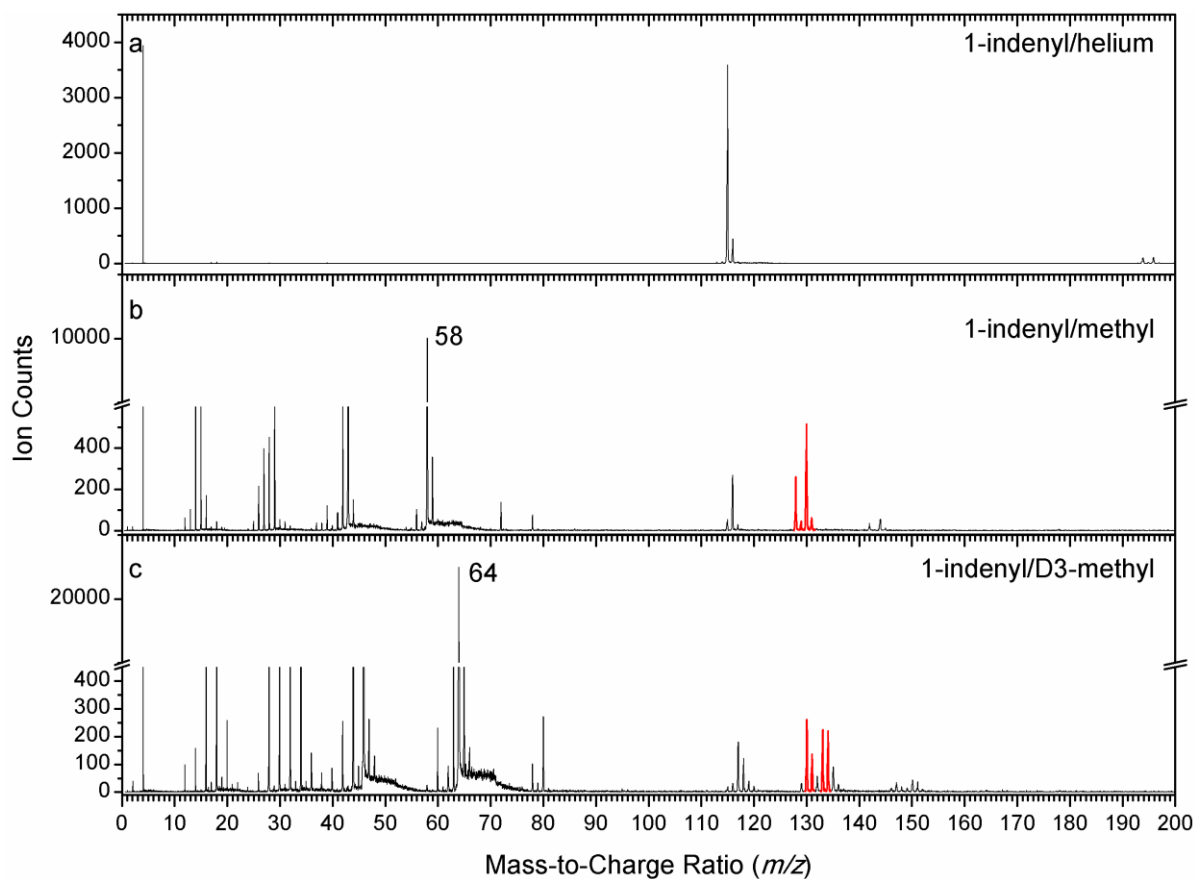

**Supplementary Figure 4.** Complete mass spectra recorded at a photon energy of 9.50 eV; the source temperature was  $1425 \pm 10$  K. (a) 1-indenyl/helium, (b) 1-indenyl/ methyl, (c) 1-indenyl/D3-methyl. Source data are provided as a Source Data file.

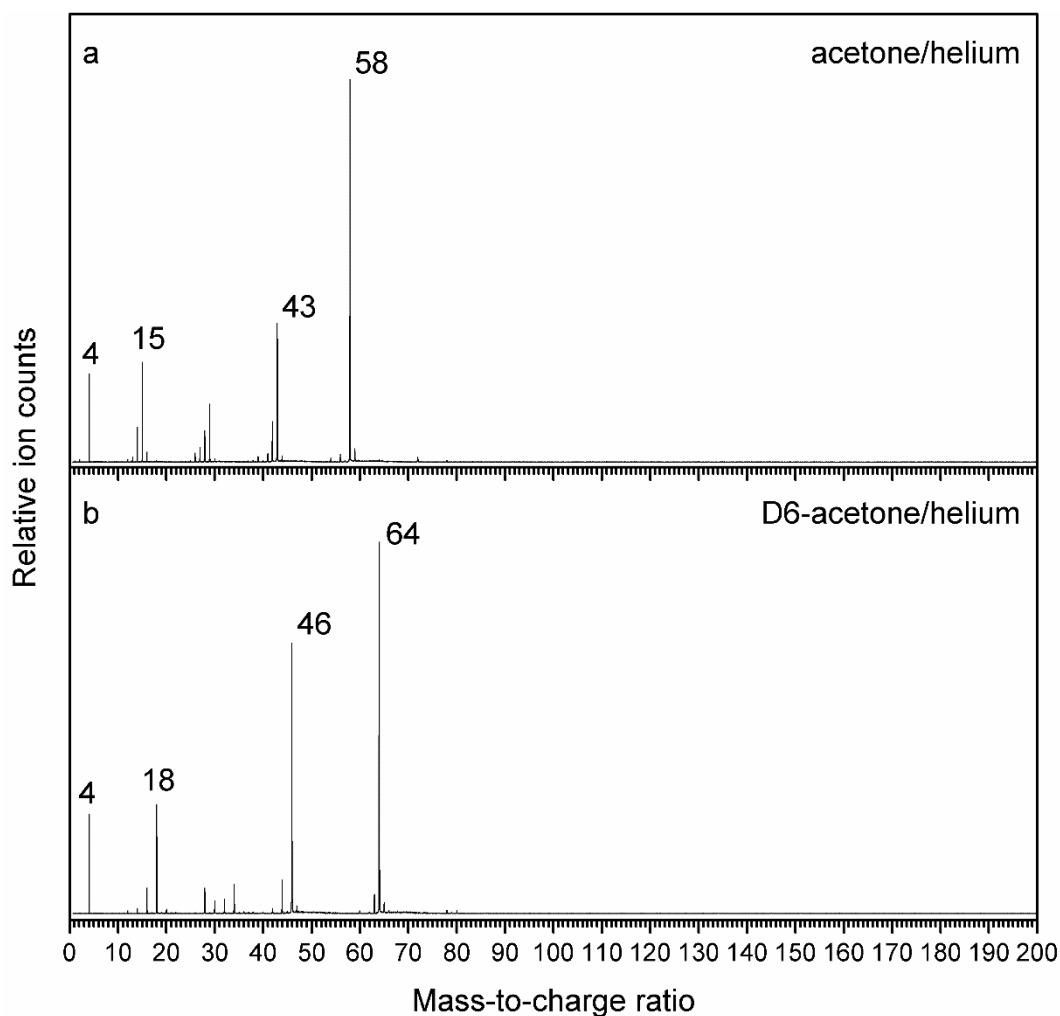

**Supplementary Figure 5.** Mass spectra recorded at a photon energy of 9.50 eV; the source temperature was  $1425 \pm 10$  K. (a) acetone/helium, (b) D6-acetone/helium.

In both acetone – helium and D6-acetone – helium systems, helium was observed at  $m/z = 4$ , with a photoionization energy of 24.6 eV,<sup>2</sup> due to the high harmonics of VUV light and the high concentration of helium. In the acetone – helium system, another three strong peaks at  $m/z = 15$ , 43 and 58 are detected. Signal at  $m/z = 58$  is attributed to acetone ( $\text{CH}_3\text{COCH}_3$ ). With the C-C bond scission, acetone is decomposed to acetyl ( $\text{CH}_3\text{CO}^*$ ) and methyl ( $\text{CH}_3^*$ ) radicals, which are at  $m/z = 15$  and 43. The species at  $m/z = 42$  should be ketene ( $\text{CH}_2\text{CO}$ ), the H-loss product of acetyl radical.

In the D6-acetone – helium system, strong signal at  $m/z = 18$ , 46 and 64 is observed. Similar as that in the acetone – helium system, these three peaks are attributed to D3-methyl ( $\text{CD}_3^*$ ), D3-acetyl ( $\text{CD}_3\text{CO}^*$ ) and D6-acetone ( $\text{CD}_3\text{COCD}_3$ ), respectively, with the previous two generated from the C-C scission of D6-acetone. Analogously, D2-ketene ( $\text{CD}_2\text{CO}$ ,  $m/z = 44$ ) is produced via D-loss of D3-acetyl. For other small signal masses, as the goal in this work is to investigate the indenyl – methyl reaction, they are not discussed in detail here.

Source data are provided as a Source Data file.

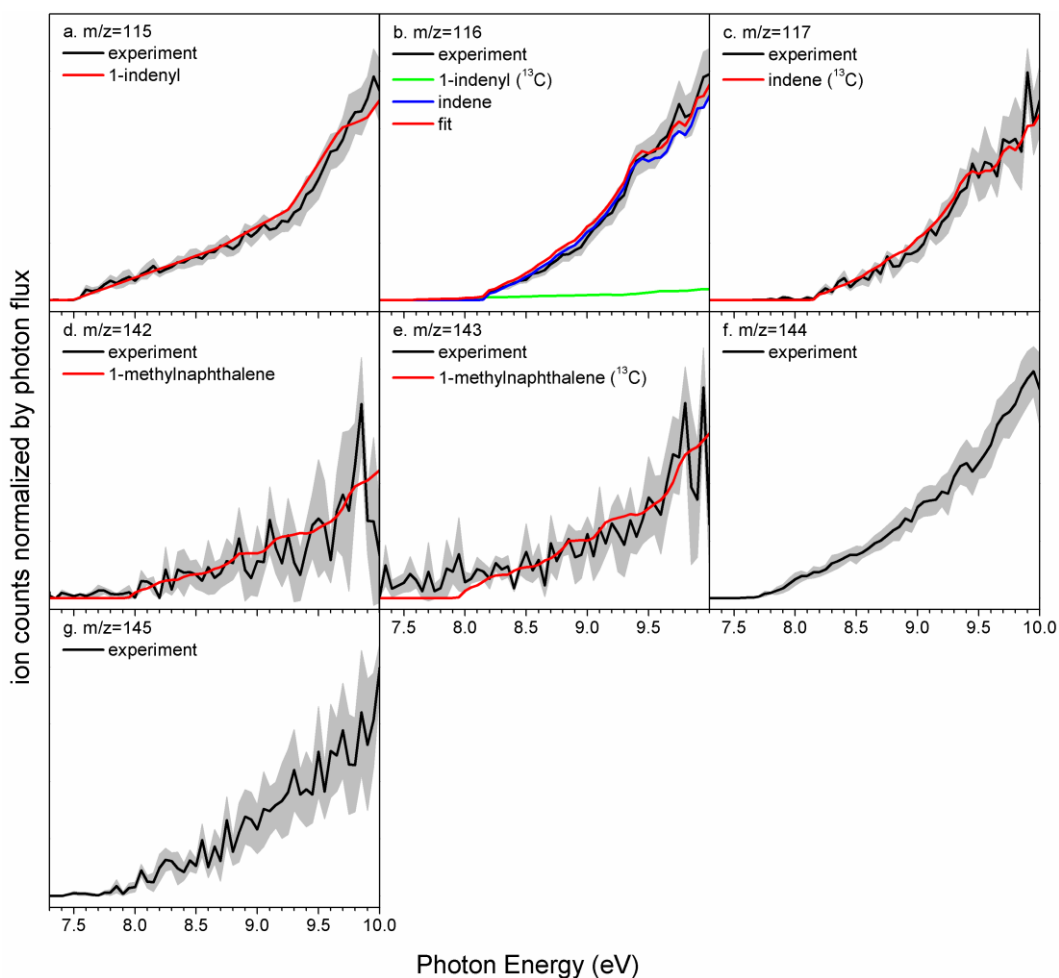

**Supplementary Figure 6:** PIE curves of additional ion counts detected in the 1-indenyl – methyl system. The detected signals include: (a)  $m/z = 115$ , (b)  $m/z = 116$ , (c)  $m/z = 117$ , (d)  $m/z = 142$ , (e)  $m/z = 143$ , (f)  $m/z = 144$  and (g)  $m/z = 145$ . Black: experimental PIE curves; blue/green/red: reference PIE curves. In case of multiple contributions to one PIE curve, the red line resembles the overall fit. The error bars consist of two parts:  $\pm 10\%$  based on the accuracy of the photodiode and a  $1 \sigma$  error of the PIE curve averaged over the individual scans.

Source data are provided as a Source Data file.

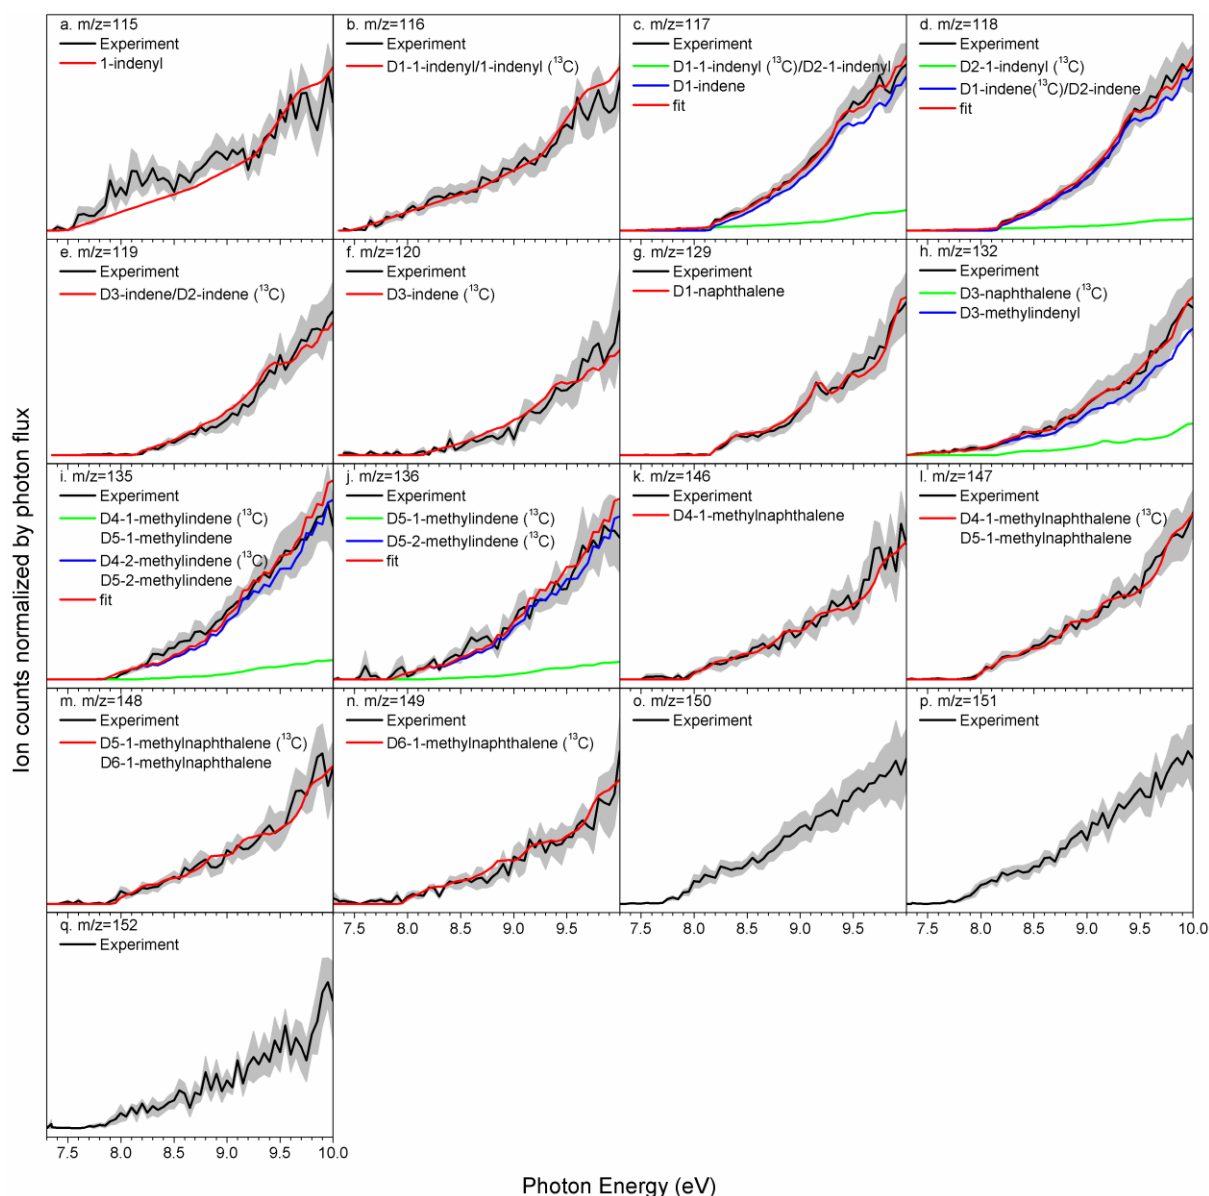

**Supplementary Figure 7:** PIE curves of additional ion counts detected in the 1-indenyl – D3-methyl system. PIE fits for signals at (a)  $m/z = 115$ , (b)  $m/z = 116$ , (c)  $m/z = 117$ , (d)  $m/z = 118$ , (e)  $m/z = 119$ , (f)  $m/z = 120$ , (g)  $m/z = 129$ , (h)  $m/z = 132$ , (i)  $m/z = 135$ , (j)  $m/z = 136$ , (k)  $m/z = 146$ , (l)  $m/z = 147$ , (m)  $m/z = 148$ , (n)  $m/z = 149$ , (o)  $m/z = 150$ , (p)  $m/z = 151$  and (q)  $m/z = 152$  are presented. Black: experimental PIE curves; blue/green/red: reference PIE curves. In case of multiple contributions to one PIE curve, the red line resembles the overall fit. The error bars consist of two parts:  $\pm 10\%$  based on the accuracy of the photodiode and a  $1\sigma$  error of the PIE curve averaged over the individual scans.

Source data are provided as a Source Data file.

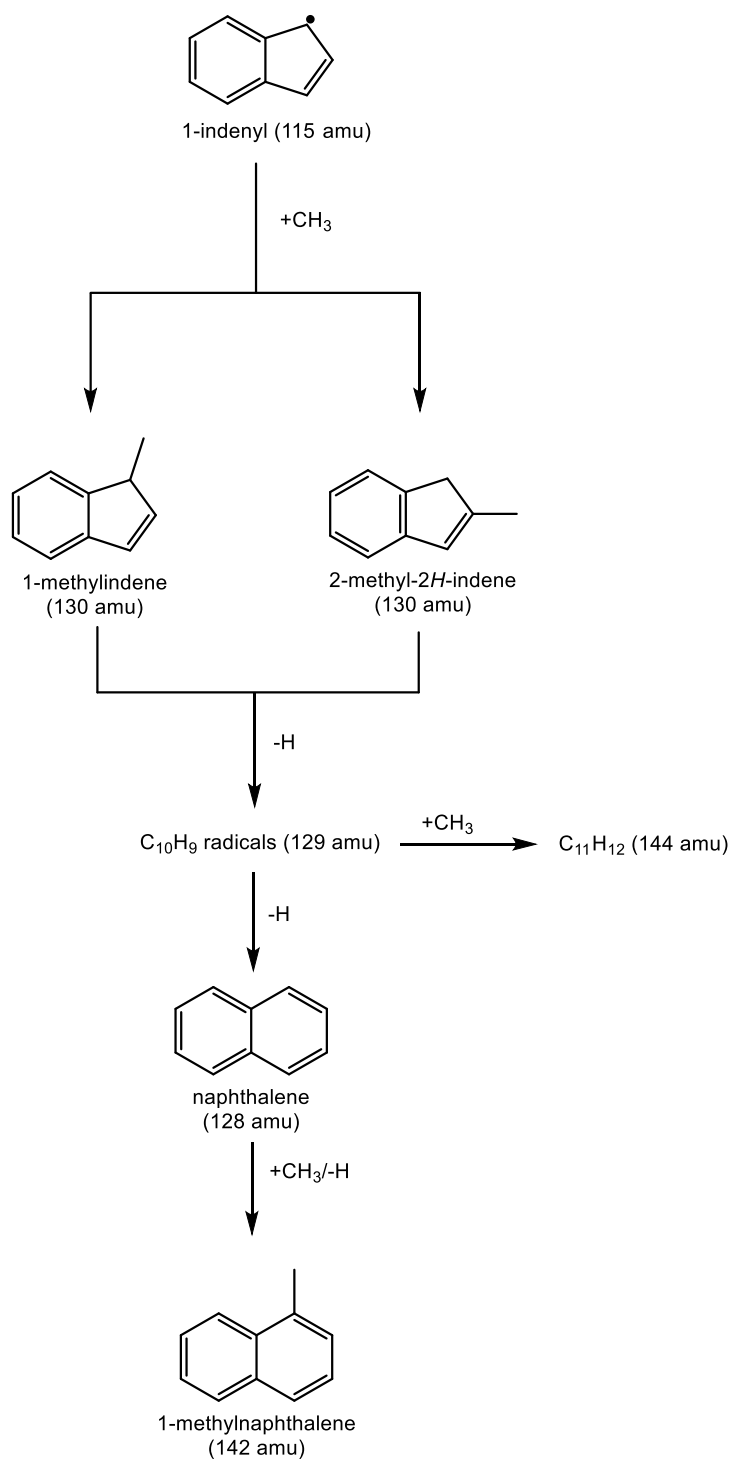

**Supplementary Figure 8:** Schematic reaction pathways in the 1-indenyl – methyl system to account for ion counts from  $m/z = 142$  to 145.

In the 1-indenyl - methyl system, ion signal from  $m/z = 142$  to 145 was also observed. The analysis of the PIE curves reveals that  $m/z = 142$  (C<sub>11</sub>H<sub>10</sub><sup>+</sup>) and 143 (<sup>13</sup>CC<sub>10</sub>H<sub>10</sub><sup>+</sup>) are attributed to 1-methylnaphthalene and <sup>13</sup>C-1-methylnaphthalene, respectively (Supplementary

Figs. 6(d) and (e)). This species might be generated via the reaction of naphthalene with a methyl radical followed by hydrogen atom loss.<sup>3</sup> Considering the ion counts at  $m/z = 144$  ( $C_{11}H_{12}^+$ ) and 145 ( $^{13}CC_{10}H_{12}^+$ ), the PIE curves overlap after scaling indicating that  $m/z = 145$  is the  $^{13}C$  counterpart of  $m/z = 144$  (Supplementary Figs. 6(f) and (g)). Considering the molecular weight, this species might be produced via the reaction of methylindene ( $C_{10}H_{10}$ ,  $m/z = 130$ ) and methyl ( $CH_3^{\bullet}$ ,  $m/z = 15$ ) followed by atomic hydrogen loss. However, due to the lack of any reference PIE data for dimethylated indene isomers,  $m/z = 144$  and 145 remain unidentified.



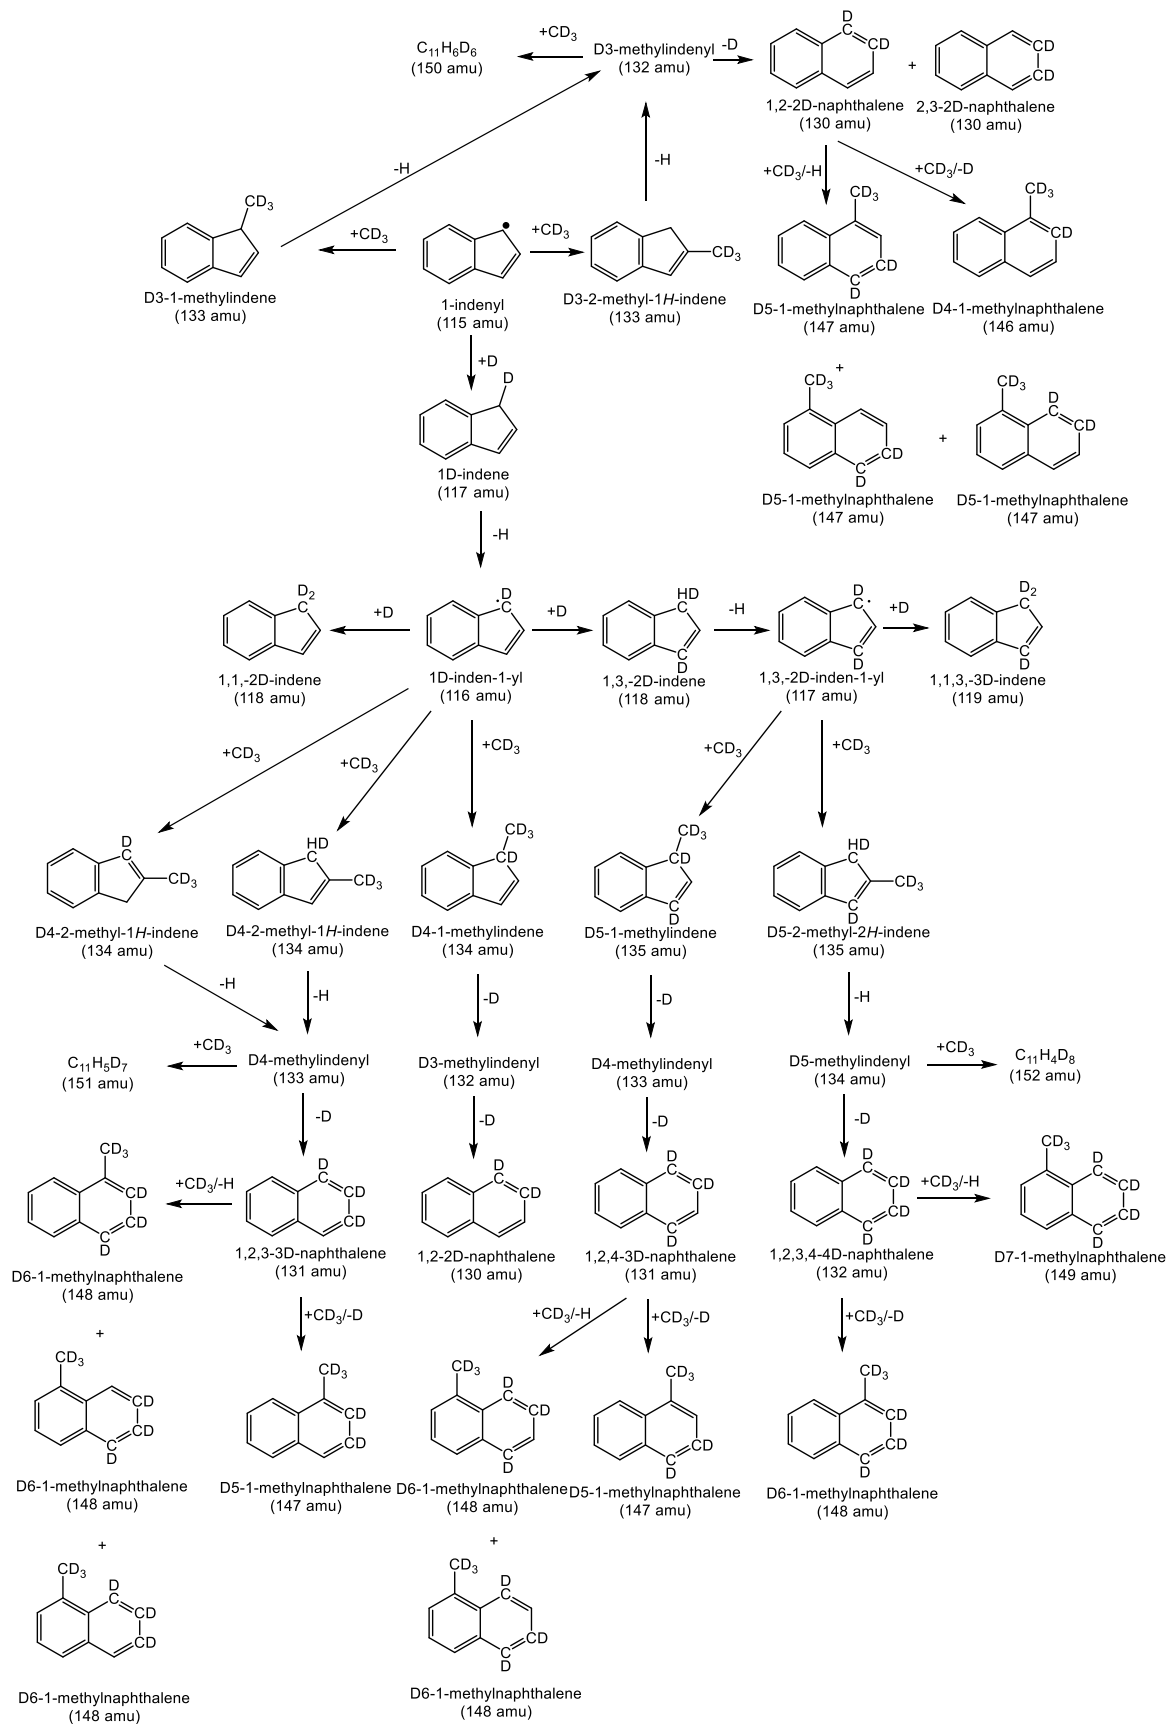

Supplementary Figure 9: Schematic reaction pathways in the 1-indenyl – D3-methyl system.

The calculated branching ratios of benzofulvene versus naphthalene at the conditions of our reactor are nearly equal to 4 to 1. Therefore, we expected the bimolecular mechanism, i.e. deuterium (D) loss from methylindenyl to eventually form benzofulvene followed by H-assisted isomerization of the latter to naphthalene, to be the most favorable mechanism. This mechanism is consistent with the isotope-labeling result if benzofulvene re-reacts with D and isomerizes to naphthalene through such D-assisted isomerization. However, it is not consistent if benzofulvene reacts with H rather than with D - then the reaction would produce naphthalene with only one D incorporated ( $m/z = 129$ ). The concentrations of hydrogen and deuterium are expected to be roughly equal because the dissociation of 1- or 2-methylindene produces hydrogen and the dissociation of D<sub>3</sub>-methylindenyl radicals produces deuterium. Therefore, technically these calculations show that 1/5 of naphthalene is produced via the unimolecular mechanism containing two deuterium atoms; 2/5 of naphthalene is likely produced via the bimolecular mechanism via a deuterium-assisted isomerization of benzofulvene containing also two deuterium atoms; finally, 2/5 of naphthalene are formed via a hydrogen-assisted isomerization of benzofulvene and contain only one deuterium. Therefore, qualitatively speaking, the intensity of the ion counts at  $m/z = 130$  are expected to be higher than at  $m/z = 129$ , which agrees with our experimental findings. Further H/D isotope scrambling involving naphthalene itself, like  $\text{H} + \text{C}_{10}\text{H}_6\text{D}_2$  (naphthalene)  $\rightleftharpoons$   $\text{D} + \text{C}_{10}\text{H}_7\text{D}_1$  (naphthalene) is favorable in reverse direction because a C-D bond is stronger than a C-H bond due to the effect of ZPE and thus, the H/D isotope scrambling will additionally boost the  $m/z = 130$  peak over  $m/z = 129$ .

Recall that in the 1-indenyl – methyl system, signal is detected from  $m/z = 115$  to 117 (1-indenyl, <sup>13</sup>C-1-indenyl/indene and <sup>13</sup>C-indene); in the 1-indenyl – D<sub>3</sub>-methyl system (Supplementary Fig. 7), six distinct peaks were observable from  $m/z = 115$  to 120. The fits of the PIE graphs indicate that – as detailed below – these ion counts can be connected with the formation of (deuterium substituted) 1-indenyl radicals and indenenes including 1-indenyl, D<sub>1</sub>- and D<sub>2</sub>-1-indenyls, D<sub>1</sub>-, D<sub>2</sub>- and D<sub>3</sub>-indenenes, as well as their <sup>13</sup>C-substituted counterparts (Supplementary Figs. 7(a)-(f)). The 1-indenyl radical ( $\text{C}_9\text{H}_7^*$ ,  $m/z = 115$ , Supplementary Fig. 7(a)) is produced from the pyrolysis of the precursor 1-bromoindene via homolytic carbon – bromine bond (C-Br) scission. The deuterated 1-indenyl radicals might be generated from 1-indenyl radical via two successive D-addition followed by H-loss. For instance, the D-addition to 1-indenyl generates 1D-indene ( $\text{C}_9\text{H}_7\text{D}$ ,  $m/z = 117$ , Supplementary Fig. 7(c)), followed by H-loss via either bond scission or H/D-exchange leading to the formation of 1D-

inden-1-yl ( $C_9H_6D^*$ ,  $m/z = 116$ , Supplementary Fig. 7(b)). Furthermore, combination of 1D-inden-1-yl and D atom yields D2-indenes including 1,1-2D-indene and 1,3-2D-indene ( $C_9H_6D_2$ ,  $m/z = 118$ , Supplementary Figs. 7(d) and S9).<sup>4</sup> Analogously, 2D-indenyl radicals ( $C_9H_5D_2^*$ ,  $m/z = 117$ , Supplementary Fig. 7(c)) and 3D-indene ( $C_9H_5D_3$ ,  $m/z = 119$ , Supplementary Fig. 7(e)) are produced in the subsequent reactions. The signal at  $m/z = 120$  is attributed to the  $^{13}C$  3D-indene ( $^{13}CC_8H_5D_3$ , Supplementary Fig. 7(f)).

The reactions of the 1-indenyl radicals with D3-methyl result in D2-, D3-, D4-naphthalenes ( $C_{10}H_6D_2$ ,  $m/z = 130$ , Fig. 3(e);  $^{13}CC_9H_6D_2/C_{10}H_5D_3$ ,  $m/z = 131$ , Fig. 3(f);  $^{13}CC_9H_5D_3/C_{10}H_4D_4$ ,  $m/z = 132$ , Supplementary Fig. 7(h)) and D3-, D4-, D5-substituted 1- and 2-methylindenes ( $C_{10}H_7D_3$ ,  $m/z = 133$ , Fig. 3(g);  $^{13}CC_9H_7D_3/C_{10}H_6D_4$ ,  $m/z = 134$ , Fig. 3(h);  $^{13}CC_9H_6D_4/C_{10}H_5D_5$ ,  $m/z = 135$ , Supplementary Fig. 7(i)). Signal at  $m/z = 136$  is related to  $^{13}C$ -D5-1-methylindene and  $^{13}C$ -D5-2-methylindene ( $^{13}CC_9H_5D_5$ , Supplementary Fig. 7(j)). Note that D3-methylindenyl radical also contributes to the signal at  $m/z = 132$  (Fig. S7(h)). Please also note the signal at  $m/z = 129$  (Supplementary Fig. 7(g)) is attributed to D1-naphthalene. The reaction of 1-indenyl plus deuterium forming D1-indene followed by decomposition to D1-indenyl plus atomic hydrogen is exoergic because the C-H bond is weaker than the C-D bond due to the effect of zero-point vibrational energy. The relatively strong signals of the deuterated indenyl radicals (Supplementary Figures 4c and 7) also suggest the existence of D1-1-indenyl radical, one of the precursors of D4-methylindene. These bimolecular reactions show the potential formation processes for deuterated indenyl radicals, and they do not go against the fact that naphthalene is formed via a 1-indenyl - methyl recombination followed by H-loss steps. Just like the formation of D3-methylindene via the reaction of 1-indenyl with D3-methyl, D4-methylindene is produced via the reaction of D1-1-indenyl with D3-methyl. In conclusion, the major source of paramount 133 and 134 peaks may not be mainly from bimolecular reactions, but they should originate from different indenyl precursors.

Signal of  $m/z = 146$  to 149 (Supplementary Figs. 7(k)-(n)) is attributed to D4-, D5- and D6-1-methylnaphthalenes and their  $^{13}C$  counterparts ( $C_{11}H_6D_4$ ,  $m/z = 146$ , Supplementary Fig. 7(k);  $^{13}CC_{10}H_6D_4/C_{11}H_5D_5$ ,  $m/z = 147$ , Supplementary Fig. 7(l);  $^{13}CC_{10}H_5D_5/C_{11}H_4D_6$ ,  $m/z = 148$ , Supplementary Fig. 7(m);  $^{13}CC_{10}H_4D_6$ ,  $m/z = 149$ , Supplementary Fig. 7(n)). These deuterated methylnaphthalenes are proposed to be generated via the corresponding deuterated naphthalene with D3-methyl followed by H- or D-loss.<sup>3</sup>

Analogous to the 1-indenyl – methyl system, signal at  $m/z = 150$  to  $152$  (Supplementary Figs. 7(o)-(q)) is attributed to products via the reaction of D3-, D4-, D5-methylindenes ( $C_{10}H_7D_3$ ,  $m/z = 133$ ;  $C_{10}H_6D_4$ ,  $m/z = 134$ ;  $C_{10}H_5D_5$ ,  $m/z = 135$ ) and D3-methyl after H- or D-loss. Due to the lack of reference PIE data, species at  $m/z = 150$  to  $152$  remain unidentified. With deuteration in different carbon positions in the 1-indenyl radical, subsequent reactions lead to a variety of deuterated products.

Please note that we cannot differentiate between  $^{13}C$ -D3-methylindene and D4-methylindene. Based on the isotope ratio and the experimental findings, this would suggest that we are making copious amounts of D4-methylindene, which means that a deuterium atom is also substituting a hydrogen atom in the ring as described in Supplementary Figure 9 in the Supplementary Material. Here, the reaction of indenyl plus deuterium forming D1-indene followed by decomposition to D1-indenyl plus atomic hydrogen is exoergic because the C-H bond is weaker than the C-D bond due to the effect of zero-point vibrational energy. This process is followed by the reaction of D1-indenyl plus D3-methyl to give D4-methylindene ( $m/z = 134$ ).

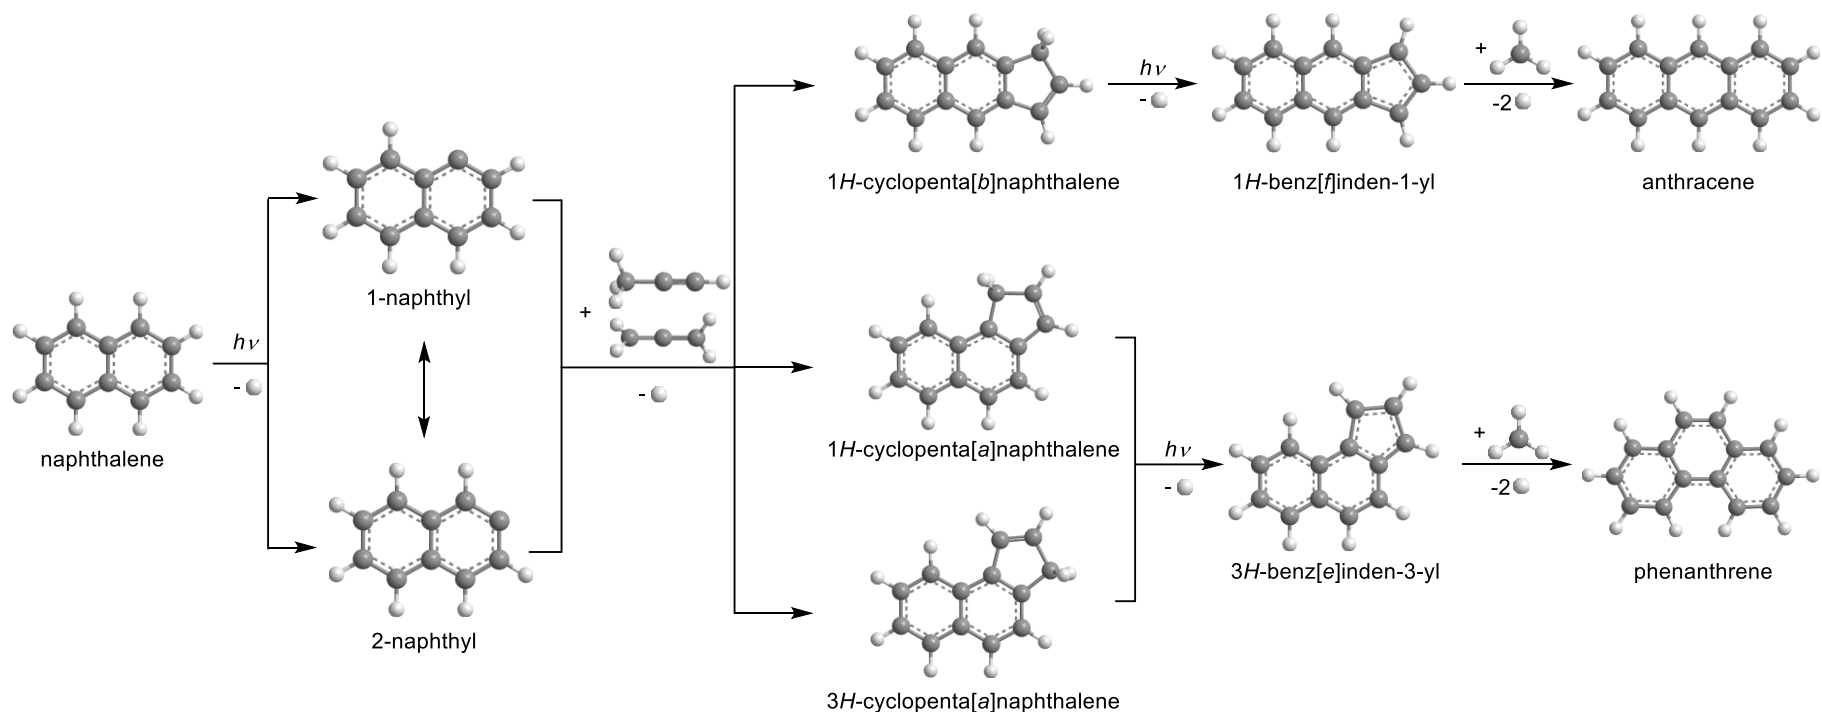

**Supplementary Figure 10:** Schematic hydrogen abstraction - methylacetylene/allene addition pathways leading to distinct cyclopentanaphthalenes isomers. Successive radical-radical mechanisms could form anthracene and phenanthrene. This pathway is presented schematically for interstellar environments (photon induced hydrogen loss); in combustion systems, the hydrogen atom can be lost via hydrogen abstraction by hydrogen atoms ubiquitous in flames.

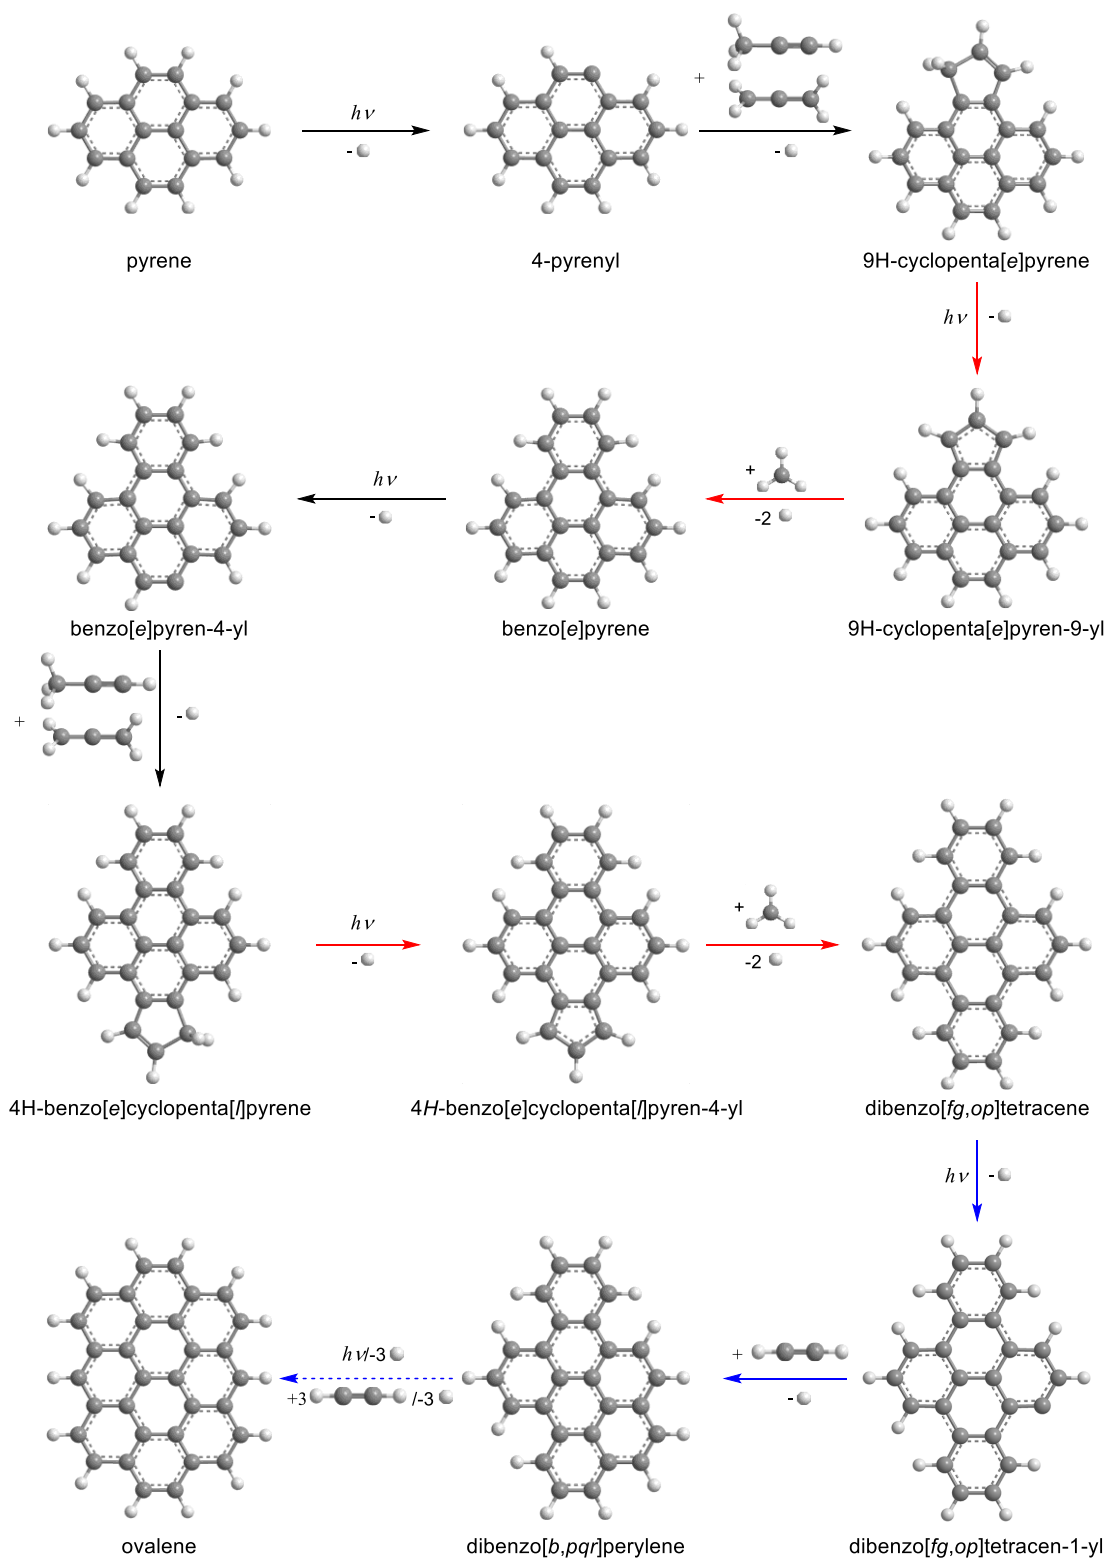

**Supplementary Figure 11:** Schematic representation of the complementary nature of the novel radical-radical (red) and the hydrogen abstraction-acetylene addition (HACA) mechanisms (blue) leading to planar PAHs. This pathway is presented schematically for extraterrestrial environments (photon induced hydrogen loss); in combustion systems, the hydrogen atom can be abstracted by a hydrogen atom ubiquitous in flames.

Pyrene (C<sub>16</sub>H<sub>10</sub>) can be photolyzed by interstellar UV photons leading to the formation of the 4-pyrenyl radical (C<sub>16</sub>H<sub>9</sub><sup>•</sup>), which reacts with allene/methylacetylene to yield 9H-cyclopenta(e)pyrene (C<sub>19</sub>H<sub>12</sub>). The latter can also be photolyzed yielding 9H-cyclopenta(e)pyren-9-yl (C<sub>19</sub>H<sub>11</sub><sup>•</sup>), which then can react with the methyl radical leading to benzo[*e*]pyrene (C<sub>20</sub>H<sub>12</sub>). Similarly, benzo[*e*]pyrene is proposed to follow the sequence of photon induced hydrogen loss to benzo[*e*]pyren-4-yl, allene/methylacetylene addition to 4H-benzo[*e*]cyclopenta[*l*]pyrene, photon induced hydrogen loss to 4H-benzo[*e*]cyclopenta[*l*]pyren-4-yl, and finally the reaction with a methyl radical generating dibenzo[*fg,op*]tetracene (C<sub>24</sub>H<sub>14</sub>). Dibenzo[*fg,op*]tetracene undergoes the successive steps of photon induced hydrogen loss and hydrogen abstraction-acetylene addition (HACA) mechanisms leading eventually to the formation of a more complex two-dimension PAH ovalene (C<sub>32</sub>H<sub>14</sub>).

**Supplementary Note 2:** Cartesian coordinates, vibrational frequencies, relative energies and hindered rotor potentials for various species in the indenyl + CH<sub>3</sub> reaction in the form of MESS input file.

```

!-----c10h10_i1-----
Well      i1
Species
RRHO
Geometry[angstrom] 20
C -0.148091887  0.0667582179  0.0862486347
C -0.0650659088  0.0525006918  1.4269282544
C 1.3433782457  0.0193898412  1.8329431884
C 2.1338586123  0.0116999981  0.6661694174
C 1.2268163446  0.0446139993  -0.5492213045
C 3.5168088264  -0.0210569114  0.7546997831
C 4.1142296668  -0.0462527784  2.0198278636
C 3.3316891988  -0.0362149898  3.1752959479
C 1.9386917056  -0.0029184267  3.0927248568
C 1.4363915606  -1.1221573368  -1.5315083074
H 4.1346204606  -0.0263288581  -0.1376558262
H 3.8120810089  -0.054898175  4.147362504
H 1.3345926949  0.0053482231  3.9937796274
H -0.8991736513  0.0649976385  2.1176263531
H 1.2944694919  -2.0802185036  -1.0258149066
H 2.4455962255  -1.1037443716  -1.9506716324
H 0.7274201392  -1.0633232901  -2.3619297055
H -1.0611025561  0.0893026785  -0.4955377858
H 5.1949467987  -0.0732246806  2.1036174262
H 1.3847010226  0.9856870338  -1.0962333887
Core RigidRotor
SymmetryFactor 1.0
End
Frequencies[1/cm] 54
112.3226      164.2919      239.9941
274.1416      289.1277      410.1819
442.1065      526.5282      553.0530
576.4507      619.8479      726.3766
741.3991      750.6582      776.8943
808.1832      868.6441      882.2438
912.7021      943.7287      963.0817
986.3983      1011.8630     1041.9247
1074.9259     1089.3478     1098.8637
1135.4114     1177.0162     1187.9488
1223.0780     1250.6298     1300.5135
1312.5262     1344.8023     1390.5183
1408.6208     1486.9040     1489.5018
1499.6752     1499.9804     1603.1318
1636.3012     1649.5572     2989.3338

```



```

3028.0415      3091.5126      3101.3863
3155.3033      3161.8663      3172.9660
3184.8260      3185.8501      3207.6164
ZeroEnergy[kcal/mol] -68.6
ElectronicLevels[1/cm] 1
0 1
End
End
!-----
!-----c10h10_i2-----
Well i2
Species
RRHO
Geometry[angstrom] 20
C -0.0029011396 0.0387383396 -0.0514920168
C -0.0831183421 -0.0061435877 1.3872775983
C 1.1712104868 -0.0336275838 2.1768051579
C 2.434793676 -0.0146569557 1.4828969973
C 2.4441410689 0.0252537098 0.1272961815
C 1.2161746397 0.0521479611 -0.6456384411
C 0.8596373362 -0.0757105014 3.4986887541
C -0.6365138627 -0.0578236727 3.6562317309
C -1.141322093 -0.0318382921 2.2392078172
C -1.2081269174 -1.1959606663 4.5247723727
H 3.3603554196 -0.033022419 2.0482276775
H 1.2926904292 0.0849084928 -1.7270346598
H -0.9128474783 0.0605743901 -0.6415103406
H -2.1904678234 -0.0243953027 1.9741915454
H -0.9581680662 -2.1679611567 4.0938880027
H -2.296261798 -1.1203622387 4.595777996
H -0.7997410939 -1.1530960908 5.5377758584
H -0.9144264772 0.8993012272 4.1312423978
H 3.386825105 0.0390479988 -0.4088962667
H 1.5519219304 -0.1063746517 4.3298306372
Core RigidRotor
SymmetryFactor 1.0
End
Frequencies[1/cm] 54
95.8576      174.0117      233.4008
256.2487      299.5536      427.2551
450.6676      491.6671      528.2161
572.9764      583.0614      688.3405
695.9362      738.8543      774.8988
799.4304      838.2060      853.6435
894.8421      905.4379      965.7227
977.6229      978.2699      998.0150
998.5364      1066.6489     1081.9745
1142.7516     1178.6989     1188.2818
1222.7763     1230.4504     1278.7435
1292.1686     1382.1872     1397.6532

```

```

1403.7517      1448.3535      1498.5167
1500.4552      1546.9577      1579.2874
1614.7622      1687.0165      2956.4381
3029.1105      3092.6984      3103.8578
3156.6113      3163.9509      3176.2302
3185.3381      3202.1543      3204.7735
ZeroEnergy[kcal/mol] -47.1
ElectronicLevels[1/cm] 1
0 1
End
End
!-----
!-----c10h10_i3-----
Well i3
Species
RRHO
Geometry[angstrom] 20
C -0.4632682478 0.3020180051 -1.9318365062
C -0.4711089164 0.0677434491 -0.5578767494
C 0.7373558429 0.0431915009 0.1677662476
C 1.9493041109 0.2508211165 -0.4703354525
C 1.9554412876 0.4859415471 -1.8500873458
C 0.7606152204 0.5106851948 -2.570300028
C 0.4179742609 -0.2296406865 1.6186219408
C -1.0937976815 -0.3545705548 1.6261758738
C -1.5696472161 -0.181141759 0.3773960214
C -1.8714905548 -0.6301547807 2.8727994971
H 2.882453676 0.2329128608 0.0838146057
H 0.7839222755 0.6943059229 -3.6389339256
H -1.3886175671 0.3225595008 -2.497720689
H -2.6152175677 -0.2185989517 0.094775994
H -1.5662427266 -1.5778332775 3.3317379214
H -2.9430649125 -0.6831971591 2.6700355104
H -1.7073585264 0.1497437076 3.6256024448
H 0.7572881495 0.5801833397 2.2772135677
H 2.8961287624 0.6502072554 -2.3636455813
H 0.8985083308 -1.1464642314 1.9836056529
Core RigidRotor
SymmetryFactor 1.0
End
Frequencies[1/cm] 54
119.5560      154.8879      211.0126
246.9788      296.4916      421.9985
427.1977      439.8495      475.8250
565.3915      607.8964      654.5523
733.0880      765.8561      801.3624
855.5672      870.5050      880.8529
891.2822      932.4126      949.7980
984.8501      1009.8937     1041.8848
1054.7357     1117.8454     1152.4559

```

|           |           |           |
|-----------|-----------|-----------|
| 1161.3682 | 1178.3921 | 1186.3216 |
| 1229.3506 | 1241.2137 | 1327.3254 |
| 1331.6634 | 1378.1210 | 1415.8969 |
| 1439.1447 | 1480.2436 | 1485.6977 |
| 1492.4716 | 1496.4890 | 1618.6210 |
| 1649.9346 | 1663.5757 | 3006.6459 |
| 3013.0829 | 3035.1512 | 3047.4373 |
| 3098.8962 | 3154.6076 | 3160.9527 |
| 3172.3901 | 3184.3748 | 3185.5952 |

ZeroEnergy[kcal/mol] -71.5

ElectronicLevels[1/cm] 1

0 1

End

End

!-----

!-----ch3\_c9h7\_p0-----

Bimolecular p0

Fragment c9h7

RRHO

Geometry[angstrom] 16

C 6.7251E-6 0.0 -0.0067899103

C 5.405214E-4 0.0 1.3930385168

C 1.3782441902 0.0 1.8506967711

C 2.2062850245 0.0 0.6869028629

C 1.3227626622 0.0 -0.4647541128

C 3.5878449156 0.0 0.8095325846

C 4.1548633018 0.0 2.0950516977

C 3.3480782116 0.0 3.2291510301

C 1.9475808142 0.0 3.1154714187

H 1.6403910173 0.0 -1.4986755909

H 4.2261134274 0.0 -0.0678746418

H 3.8046257482 0.0 4.2124022047

H 1.3284188847 0.0 4.0064725223

H -0.8724838361 0.0 2.0319019107

H -0.8804382002 0.0 -0.6335630148

H 5.2334485921 0.0 2.203874751

Core RigidRotor

SymmetryFactor 1

End

Frequencies[1/cm] 42

|           |           |           |
|-----------|-----------|-----------|
| 199.1610  | 240.5161  | 391.8290  |
| 414.1648  | 534.9722  | 549.1649  |
| 560.3268  | 578.8571  | 713.0492  |
| 744.4367  | 754.1336  | 760.5516  |
| 804.5421  | 864.4476  | 874.9078  |
| 887.3348  | 902.2059  | 943.0014  |
| 979.8202  | 1013.5489 | 1034.4682 |
| 1081.1772 | 1092.5515 | 1181.2233 |
| 1185.1137 | 1212.2337 | 1219.4915 |
| 1329.3270 | 1371.6508 | 1384.5319 |

```

1463.7594      1488.4738      1489.2815
1617.7974      1625.1073      3159.9688
3165.4443      3175.9796      3189.2696
3203.5608      3211.0357      3228.6412
ZeroEnergy[kcal/mol]  0.0
ElectronicLevels[1/cm]  1
0 2
End
Fragment      ch3
RRHO
Geometry[angstrom]  4
C 0.0  1.995E-7  0.0
H 0.0  1.0804553795  0.0
H 0.9357017515  -0.5402277895  0.0
H -0.9357017515  -0.5402277895  0.0
Core RigidRotor
SymmetryFactor 6
End
Frequencies[1/cm]  6
505.1501      1403.0831      1403.0885
3103.6402      3282.6573      3282.6683
ZeroEnergy[kcal/mol]  0.0
ElectronicLevels[1/cm]  1
0 2
End
GroundEnergy[kcal/mol] 0.0
End
!-----h_c10h9_p1-----
Bimolecular  p1
Fragment      c10h9
RRHO
Geometry[angstrom]  19
C 0.400357  0.954177  0.0
C -0.16028  -0.358173  0.0
C 0.666652  -1.472953  0.0
C 2.057725  -1.285784  0.0
C 2.604179  -0.004322  0.0
C 1.777006  1.129251  0.0
C -0.708489  1.890534  0.0
C -1.612436  -0.21536  0.0
C -2.593341  -1.337872  0.0
C -1.898651  1.161044  0.0
H 0.254452  -2.476725  0.0
H 3.681307  0.119062  0.0
H 2.21253  2.123037  0.0
H -0.61916  2.968561  0.0
H -2.461241  -1.9801685  0.878959
H -2.462241  -1.9801685  -0.878959
H -3.621311  -0.971083  0.0
H -2.894708  1.582929  0.0

```

```

H 2.714047 -2.148703 0.0
Core RigidRotor
SymmetryFactor 1
End
Frequencies[1/cm] 51
102.2975      142.0659      205.5237
229.3953      308.2155      416.4227
459.6878      524.2789      556.6522
558.2369      597.5389      692.5842
724.0869      756.5346      757.9911
779.1648      864.1946      871.3037
886.9060      940.5644      957.4496
978.0569      1030.3384     1034.4476
1043.1175     1085.4469     1104.2817
1180.0009     1190.6339     1214.3339
1285.5876     1322.7418     1369.1508
1405.1409     1433.5558     1441.5595
1475.3238     1484.7390     1491.1617
1507.4846     1618.0643     1624.1122
3005.3032     3043.5726     3103.3542
3158.2164     3163.9754     3174.4908
3187.6888     3200.8656     3218.5419
ZeroEnergy[kcal/mol] 0.0
ElectronicLevels[1/cm] 1
0 2
End
Fragment      H
Atom
Mass[amu] 1
ElectronicLevels[1/cm] 1
0 2
End
GroundEnergy[kcal/mol] 7.1
End
!-----h_c10h9_p2-----
Bimolecular p2
Fragment      c10h9
RRHO
Geometry[angstrom] 19
C 1.1640393806 1.1348827835 -1.065889E-4
C -0.2270401106 0.7140866126 -8.57467E-5
C -0.2284991681 -0.7140509708 9.01415E-5
C 1.1567908259 -1.1369662868 1.700585E-4
C 1.9854471733 0.0032929323 4.20454E-5
C -1.4259456412 -1.4141254205 1.668385E-4
C -2.6334792152 -0.6941729947 6.1729E-5
C -2.6314098853 0.6964669294 -1.120873E-4
C -1.4215775428 1.4150716772 -1.849803E-4
C 3.4876041184 -0.001835191 -1.7457E-6
H -1.4382409944 -2.4991244486 3.044896E-4

```

H -3.5723598131 1.2349272034 -1.910518E-4  
H -1.432977907 2.5000710984 -3.181619E-4  
H 1.5075542035 2.1616769483 -2.069657E-4  
H 3.8845717017 1.015395051 0.0012423636  
H -3.5758044988 -1.2301182283 1.179947E-4  
H 1.4976686195 -2.16482257 3.186176E-4  
H 3.8869144233 -0.5156717345 0.8802608873  
H 3.8868833303 -0.513475391 -0.8815678373

Core RigidRotor  
SymmetryFactor 1  
End

Rotor Hindered !CH3  
Group 15 18 19  
Axis 5 10  
Symmetry 3  
Potential[kcal/mol] 4

0.0 0.019 0.013 0.025

End

Frequencies[1/cm] 50

|           |           |           |
|-----------|-----------|-----------|
| 126.9905  | 239.2772  |           |
| 248.0202  | 309.2232  | 420.2691  |
| 446.7713  | 484.7658  | 537.9351  |
| 560.5027  | 573.8546  | 654.2678  |
| 740.8150  | 742.8119  | 787.5784  |
| 798.7529  | 823.9302  | 870.9552  |
| 886.0648  | 939.5100  | 960.0946  |
| 974.6346  | 976.1699  | 1033.3524 |
| 1055.5575 | 1088.4750 | 1154.3733 |
| 1171.3032 | 1181.7303 | 1212.3972 |
| 1219.8208 | 1288.6825 | 1337.6311 |
| 1400.0241 | 1423.8380 | 1482.1685 |
| 1486.9546 | 1488.5235 | 1497.2997 |
| 1537.1147 | 1617.3793 | 1627.6591 |
| 3020.8336 | 3066.4202 | 3099.1409 |
| 3158.8814 | 3164.2822 | 3174.9782 |
| 3188.5274 | 3196.9769 | 3200.0597 |

ZeroEnergy[kcal/mol] 0.0

ElectronicLevels[1/cm] 1

0 2

End

Fragment H

Atom

Mass[amu] 1

ElectronicLevels[1/cm] 1

0 2

End

GroundEnergy[kcal/mol] 9.7

End

!-----barrier\_ts3-----

Barrier ts3 il i2

RRHO

Geometry[angstrom] 20

C 0.0601426018 -0.0801791298 -0.0296681755  
C 0.0720828017 -0.0254254241 1.3781515637  
C 1.4355482756 -0.1319901587 1.8473238917  
C 2.2675170695 -0.2452631126 0.7142667705  
C 1.3983743697 -0.1940167886 -0.4646650116  
C 1.7292119276 -0.1017950007 3.2299576803  
C 0.6956822834 0.0161562086 4.1286403707  
C -0.6483333893 0.1289577193 3.6741395504  
C -0.9659907319 0.1187704837 2.336906266  
C 2.2945536109 1.4959947117 -0.3128252407  
H 2.7556722952 -0.1832811029 3.5735838069  
H -1.4397637081 0.2275056719 4.4099889044  
H -1.997781815 0.2114501073 2.0148020184  
H -0.8060522328 -0.0168565004 -0.671257961  
H 1.6821432706 2.0930814669 0.3522130492  
H 2.09818448 1.7311104031 -1.3574840281  
H 3.3599649302 1.6096808281 -0.1191237784  
H 1.7086902747 -0.5240959113 -1.4463657779  
H 0.8968358266 0.0257541087 5.1937415172  
H 3.3101048596 -0.5249005802 0.7020805839

Core RigidRotor

SymmetryFactor 1.0

End

Tunneling Eckart

ImaginaryFrequency[1/cm] 748.0434

WellDepth[kcal/mol] 54.6

WellDepth[kcal/mol] 33.1

End

Frequencies[1/cm] 53

|           |           |           |
|-----------|-----------|-----------|
| 135.8540  | 188.8372  |           |
| 223.3598  | 306.1774  | 379.9923  |
| 431.4193  | 473.0773  | 505.5166  |
| 556.3826  | 580.8540  | 599.6464  |
| 703.3276  | 753.3344  | 754.2485  |
| 780.8846  | 827.9242  | 858.1041  |
| 877.7790  | 885.8266  | 898.1922  |
| 950.6810  | 958.2176  | 985.9852  |
| 1015.5480 | 1019.3999 | 1057.2230 |
| 1079.2300 | 1146.2517 | 1174.8088 |
| 1209.5403 | 1243.8566 | 1259.4576 |
| 1288.3791 | 1363.8022 | 1376.4343 |
| 1388.6598 | 1418.1441 | 1442.8708 |
| 1481.3705 | 1488.7333 | 1534.9982 |
| 1569.9442 | 1653.8833 | 3054.1838 |
| 3131.1237 | 3152.0371 | 3157.5219 |
| 3171.3199 | 3183.8851 | 3201.7358 |
| 3211.1448 | 3224.6253 | 3231.1608 |

ZeroEnergy[kcal/mol] -14.0

```

ElectronicLevels[1/cm] 1
0 1
End
!-----
!-----barrier_ts5-----
Barrier   ts5 i2 i3
RRHO
Geometry[angstrom] 20
C 0.0499046104 0.0667334723 -0.0771857799
C 1.21426E-5 -0.1604125044 1.3261097654
C 1.2343138456 -0.1773510232 2.0763989669
C 2.4733632511 0.0282637916 1.4202006588
C 2.4819899108 0.2180135445 0.0610031078
C 1.2675241029 0.2395723584 -0.6844718469
C 0.9171509219 -0.388829472 3.4311817745
C -0.5702894234 -0.4704824672 3.5274421778
C -1.0768338561 -0.3438427298 2.2058081858
C -1.3110715529 -0.9986194253 4.728348102
H 3.3996022178 0.0195429257 1.9852659952
H 1.3160479334 0.4001137098 -1.7562140185
H -0.8666351805 0.0919989383 -0.6570045071
H -2.1261111103 -0.3572600097 1.9469467925
H -1.3319466616 -2.0920684572 4.7068913456
H -2.3430669685 -0.6413305162 4.7430147439
H -0.8344840416 -0.6947703084 5.6638762398
H -0.0164849055 0.6141082942 3.7870762519
H 3.4220354001 0.3580256798 -0.4608732763
H 1.5828643638 -0.5184438013 4.2723873208
Core RigidRotor
SymmetryFactor 1.0
End
Tunneling Eckart
ImaginaryFrequency[1/cm] 1173.0932
WellDepth[kcal/mol] 15.4
WellDepth[kcal/mol] 39.8
End
Frequencies[1/cm] 53
131.5075      173.2842
228.9907      260.9813      311.0955
440.0861      453.4274      492.8856
563.7043      600.1463      629.6141
665.4268      719.5628      746.2410
788.0228      805.2946      831.9715
861.3245      906.6013      941.5641
956.3488      988.2586      1000.6119
1019.1173     1059.7231     1126.2366
1145.5834     1179.1462     1184.9479
1211.9745     1246.6876     1299.4794
1365.7524     1379.9064     1380.6985
1421.7726     1465.3107     1492.1948

```



|           |           |           |
|-----------|-----------|-----------|
| 1493.5279 | 1505.5064 | 1543.2281 |
| 1572.6042 | 1661.8275 | 2137.7041 |
| 3029.9319 | 3086.4130 | 3101.3521 |
| 3154.8319 | 3161.5373 | 3173.3436 |
| 3184.5163 | 3214.8331 | 3225.2599 |

ZeroEnergy[kcal/mol] -31.7

ElectronicLevels[1/cm] 1

0 1

End

!-----

Barrier ts1 i1 p0 #

RRHO

Stoichiometry C10H10

Core Rotd

File ts1\_flux.out

SymmetryFactor 1.0

End

Frequencies[1/cm] 48

|           |           |           |
|-----------|-----------|-----------|
| 199.1610  | 240.5161  | 391.8290  |
| 414.1648  | 534.9722  | 549.1649  |
| 560.3268  | 578.8571  | 713.0492  |
| 744.4367  | 754.1336  | 760.5516  |
| 804.5421  | 864.4476  | 874.9078  |
| 887.3348  | 902.2059  | 943.0014  |
| 979.8202  | 1013.5489 | 1034.4682 |
| 1081.1772 | 1092.5515 | 1181.2233 |
| 1185.1137 | 1212.2337 | 1219.4915 |
| 1329.3270 | 1371.6508 | 1384.5319 |
| 1463.7594 | 1488.4738 | 1489.2815 |
| 1617.7974 | 1625.1073 | 3159.9688 |
| 3165.4443 | 3175.9796 | 3189.2696 |
| 3203.5608 | 3211.0357 | 3228.6412 |
| 505.1501  | 1403.0831 | 1403.0885 |
| 3103.6402 | 3282.6573 | 3282.6683 |

ZeroEnergy[kcal/mol] 0.0

ElectronicLevels[1/cm] 1

0 1

End

!-----

Barrier ts2 i1 p1 #

RRHO

Stoichiometry C10H10

Core Rotd

File ts2\_flux.out

SymmetryFactor 1.0

End

Frequencies[1/cm] 51

|          |          |          |
|----------|----------|----------|
| 102.2975 | 142.0659 | 205.5237 |
|----------|----------|----------|

S33

|           |           |           |
|-----------|-----------|-----------|
| 229.3953  | 308.2155  | 416.4227  |
| 459.6878  | 524.2789  | 556.6522  |
| 558.2369  | 597.5389  | 692.5842  |
| 724.0869  | 756.5346  | 757.9911  |
| 779.1648  | 864.1946  | 871.3037  |
| 886.9060  | 940.5644  | 957.4496  |
| 978.0569  | 1030.3384 | 1034.4476 |
| 1043.1175 | 1085.4469 | 1104.2817 |
| 1180.0009 | 1190.6339 | 1214.3339 |
| 1285.5876 | 1322.7418 | 1369.1508 |
| 1405.1409 | 1433.5558 | 1441.5595 |
| 1475.3238 | 1484.7390 | 1491.1617 |
| 1507.4846 | 1618.0643 | 1624.1122 |
| 3005.3032 | 3043.5726 | 3103.3542 |
| 3158.2164 | 3163.9754 | 3174.4908 |
| 3187.6888 | 3200.8656 | 3218.5419 |

ZeroEnergy[kcal/mol] 7.1

ElectronicLevels[1/cm] 1

0 1

End

!-----

Barrier ts7 i2 p0 #

RRHO

Stoichiometry C10H10

Core Rotd

File ts7\_flux.out

SymmetryFactor 1.0

End

Frequencies[1/cm] 48

|           |           |           |
|-----------|-----------|-----------|
| 199.1610  | 240.5161  | 391.8290  |
| 414.1648  | 534.9722  | 549.1649  |
| 560.3268  | 578.8571  | 713.0492  |
| 744.4367  | 754.1336  | 760.5516  |
| 804.5421  | 864.4476  | 874.9078  |
| 887.3348  | 902.2059  | 943.0014  |
| 979.8202  | 1013.5489 | 1034.4682 |
| 1081.1772 | 1092.5515 | 1181.2233 |
| 1185.1137 | 1212.2337 | 1219.4915 |
| 1329.3270 | 1371.6508 | 1384.5319 |
| 1463.7594 | 1488.4738 | 1489.2815 |
| 1617.7974 | 1625.1073 | 3159.9688 |
| 3165.4443 | 3175.9796 | 3189.2696 |
| 3203.5608 | 3211.0357 | 3228.6412 |
| 505.1501  | 1403.0831 | 1403.0885 |
| 3103.6402 | 3282.6573 | 3282.6683 |

ZeroEnergy[kcal/mol] 0.0

ElectronicLevels[1/cm] 1

0 1

End

!-----  
Barrier ts4 i2 p2 #

Geometry[angstrom] 20  
C 1.1640393806 1.1348827835 -1.065889E-4  
C -0.2270401106 0.7140866126 -8.57467E-5  
C -0.2284991681 -0.7140509708 9.01415E-5  
C 1.1567908259 -1.1369662868 1.700585E-4  
C 1.9854471733 0.0032929323 4.20454E-5  
C -1.4259456412 -1.4141254205 1.668385E-4  
C -2.6334792152 -0.6941729947 6.1729E-5  
C -2.6314098853 0.6964669294 -1.120873E-4  
C -1.4215775428 1.4150716772 -1.849803E-4  
C 3.4876041184 -0.001835191 -1.7457E-6  
H -1.4382409944 -2.4991244486 3.044896E-4  
H -3.5723598131 1.2349272034 -1.910518E-4  
H -1.432977907 2.5000710984 -3.181619E-4  
H 1.5075542035 2.1616769483 -2.069657E-4  
H 3.8845717017 1.015395051 0.0012423636  
H -3.5758044988 -1.2301182283 1.179947E-4  
H 1.4976686195 -2.16482257 3.186176E-4  
H 3.8869144233 -0.5156717345 0.8802608873  
H 3.8868833303 -0.513475391 -0.8815678373  
H 20.0000000 0.0000000 0.0000000

RRHO  
Stoichiometry C10H10  
Core Rotd  
File ts4\_flux.out  
SymmetryFactor 1.0  
End

Rotor Hindered !CH3  
Group 15 18 19  
Axis 5 10  
Symmetry 3  
Potential[kcal/mol] 4  
0.0 0.019 0.013 0.025  
End

Frequencies[1/cm] 50  
126.9905 239.2772  
248.0202 309.2232 420.2691  
446.7713 484.7658 537.9351  
560.5027 573.8546 654.2678  
740.8150 742.8119 787.5784  
798.7529 823.9302 870.9552  
886.0648 939.5100 960.0946  
974.6346 976.1699 1033.3524  
1055.5575 1088.4750 1154.3733

|           |           |           |
|-----------|-----------|-----------|
| 1171.3032 | 1181.7303 | 1212.3972 |
| 1219.8208 | 1288.6825 | 1337.6311 |
| 1400.0241 | 1423.8380 | 1482.1685 |
| 1486.9546 | 1488.5235 | 1497.2997 |
| 1537.1147 | 1617.3793 | 1627.6591 |
| 3020.8336 | 3066.4202 | 3099.1409 |
| 3158.8814 | 3164.2822 | 3174.9782 |
| 3188.5274 | 3196.9769 | 3200.0597 |

ZeroEnergy[kcal/mol] 9.7

ElectronicLevels[1/cm] 1

0 1

End

!-----

Barrier ts6 i3 p2 #

RRHO

Stoichiometry C10H10

Core Rotd

File ts6\_flux.out

SymmetryFactor 1.0

End

Frequencies[1/cm] 51

|           |           |           |
|-----------|-----------|-----------|
| 35.9      | 126.9905  | 239.2772  |
| 248.0202  | 309.2232  | 420.2691  |
| 446.7713  | 484.7658  | 537.9351  |
| 560.5027  | 573.8546  | 654.2678  |
| 740.8150  | 742.8119  | 787.5784  |
| 798.7529  | 823.9302  | 870.9552  |
| 886.0648  | 939.5100  | 960.0946  |
| 974.6346  | 976.1699  | 1033.3524 |
| 1055.5575 | 1088.4750 | 1154.3733 |
| 1171.3032 | 1181.7303 | 1212.3972 |
| 1219.8208 | 1288.6825 | 1337.6311 |
| 1400.0241 | 1423.8380 | 1482.1685 |
| 1486.9546 | 1488.5235 | 1497.2997 |
| 1537.1147 | 1617.3793 | 1627.6591 |
| 3020.8336 | 3066.4202 | 3099.1409 |
| 3158.8814 | 3164.2822 | 3174.9782 |
| 3188.5274 | 3196.9769 | 3200.0597 |

ZeroEnergy[kcal/mol] 9.7

ElectronicLevels[1/cm] 1

0 1

End

!=====

End

## Supplementary References

- 1 Zhao, L. *et al.* Reactivity of the indenyl radical (C<sub>9</sub>H<sub>7</sub>) with acetylene (C<sub>2</sub>H<sub>2</sub>) and vinylacetylene (C<sub>4</sub>H<sub>4</sub>). *ChemPhysChem* **20**, 1437-1447 (2019).
- 2 Lide, D. R. Ionization potentials of atoms and atomic ions. *Handbook of chemistry and physics*, 10-211 (1992).
- 3 Colket, M. B. & Seery, D. J. Reaction mechanisms for toluene pyrolysis. *Proc. Combust. Inst.* **25**, 883-891 (1994).
- 4 Jin, H. *et al.* An experimental study of indene pyrolysis with synchrotron vacuum ultraviolet photoionization mass spectrometry. *Phys. Chem. Chem. Phys.* **21**, 5510-5520 (2019).
